# Supplementary material for: Machine learning assisted analysis on TCR profiling data from COVID-19-convalescent and healthy individuals unveils cross-reactivity between SARS-CoV-2 and a wide spectrum of pathogens and other diseases
Source: bioRxiv or medRxiv preprint supplement (doi:10.1101/2022.05.10.22274905), 2022-05-10
Supplement: Supplementary file [file media-1.zip]

Supplementary Information: Machine learning assisted analysis on TCR profiling data from COVID-19-convalescent and healthy individuals unveils cross-reactivity between SARS-CoV-2 and a wide spectrum of pathogens and other diseases

Georgios K. Georgakilas<sup>1,2,+</sup>, Achilleas P. Galanopoulos<sup>1,3,+</sup>, Zafeiris Tsinaris<sup>1</sup>, Maria Kyritsi<sup>1</sup>, Varvara Mouchtouri<sup>1</sup>, Matthaios Speletas<sup>3,#,\*</sup> and Christos Hadjichristodoulou<sup>1,#</sup>.

<sup>1</sup> Laboratory of Hygiene and Epidemiology, Faculty of Medicine, University of Thessaly, Greece.

<sup>2</sup> Laboratory of Genetics, Department of Biology, University of Patras, Greece.

<sup>3</sup> Department of Immunology & Histocompatibility, Faculty of Medicine, University of Thessaly, Greece.

<sup>+,#</sup> Equal contribution.

\* To whom correspondence should be addressed.

Counts of cross-reactive MIRA CDR3 sequences that recognize epitopes of SARS-CoV-2 and other pathogens and diseases (only CD8+ T cell TCRs)

Pathogens & diseases

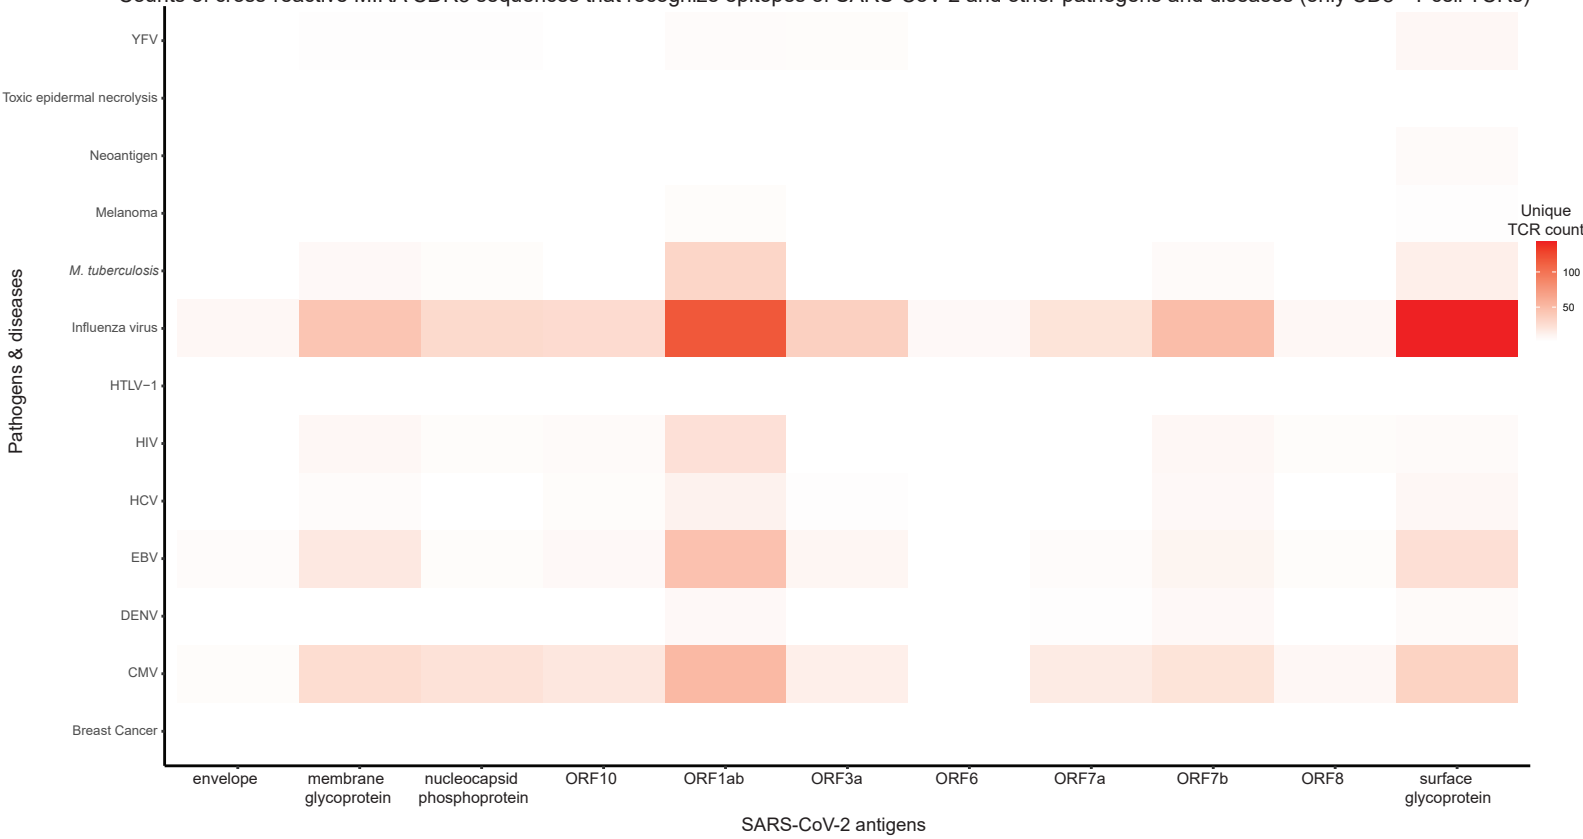

Supplementary Figure 1. Cross-reactivity analysis of all Multiplexed Identification of T cell Receptor Antigen (MIRA) T cell receptors (TCRs) only from CD8+ T cells. The cross-reactivity is depicted as a heatmap of unique MIRA complementarity-determining region 3 (CDR3) counts that exhibit cross-reactivity between SARS-CoV-2 (x-axis) and other pathogens and diseases (y-axis).
